# Supplementary material for: Hybrid assembly of an agricultural slurry virome reveals a diverse and stable community with the potential to alter the metabolism and virulence of veterinary pathogens
Source: PubMed Central journal article supplement (PMC7981956; doi:10.1186/s40168-021-01010-3), 2021-03-20

Supplementary figure 1

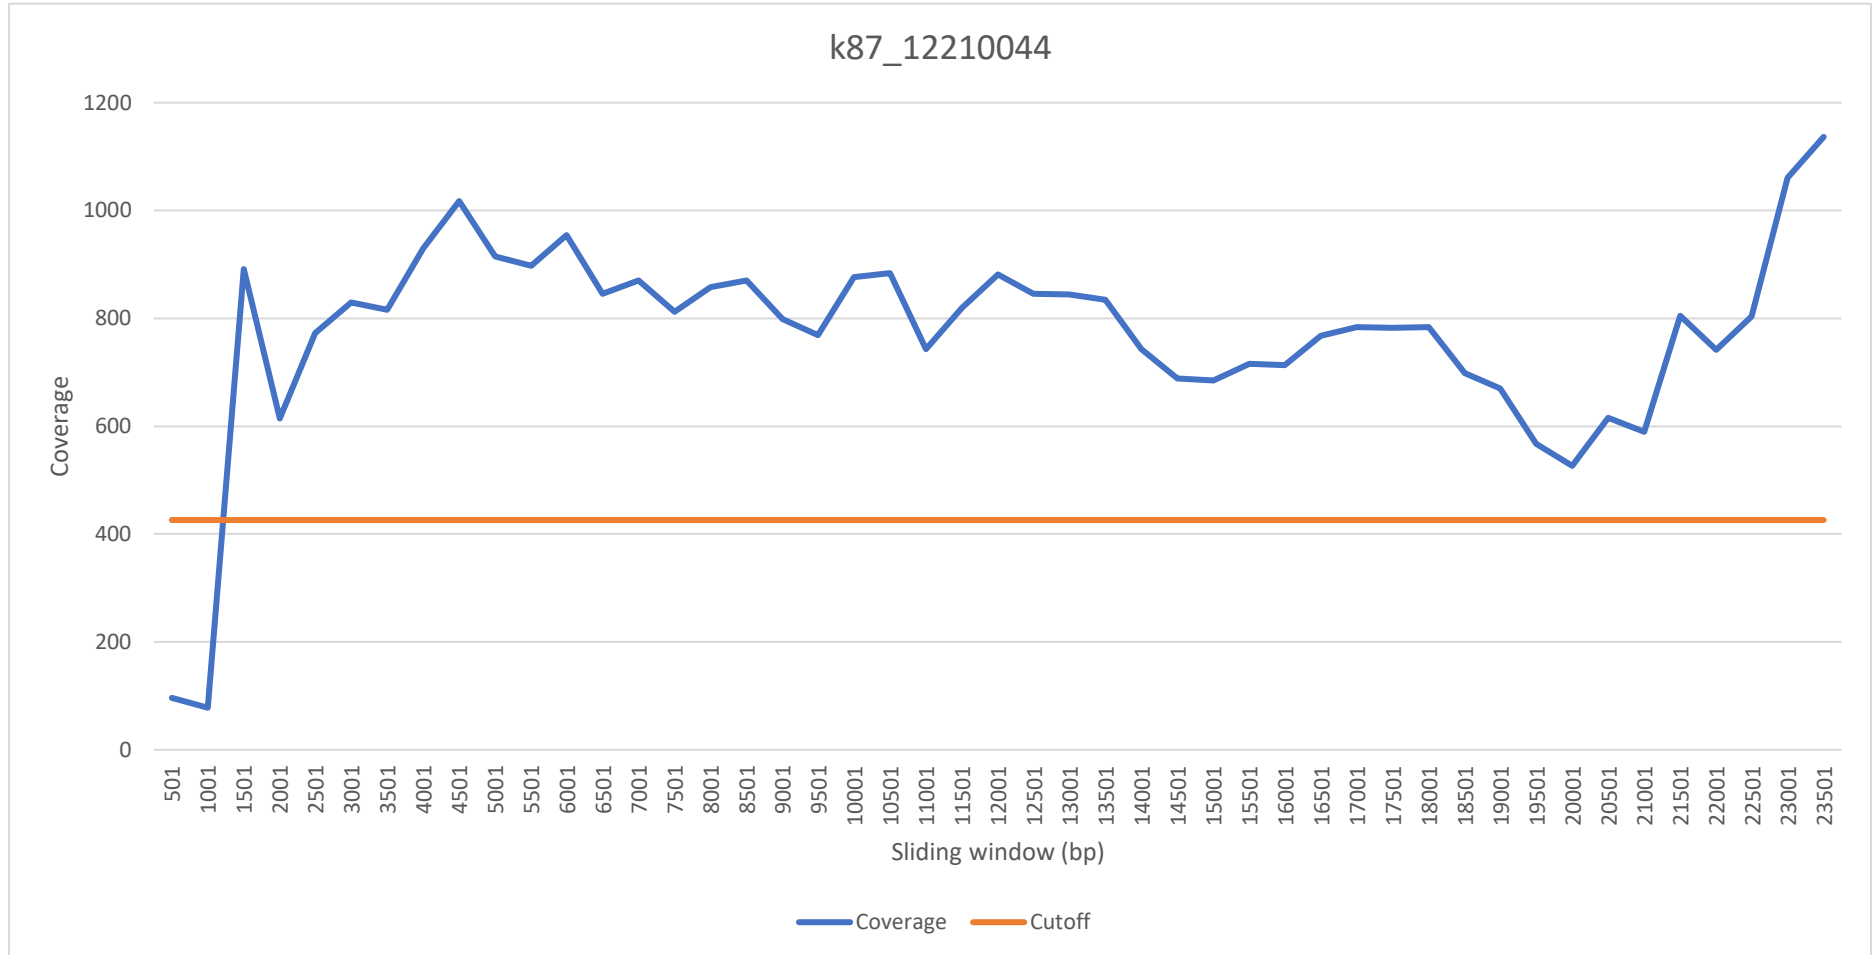



# Supplementary figure 3

## Primase

Tree scale: 1

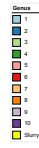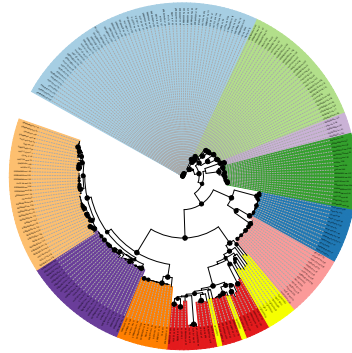

## Terminase

Tree scale: 0.1

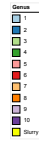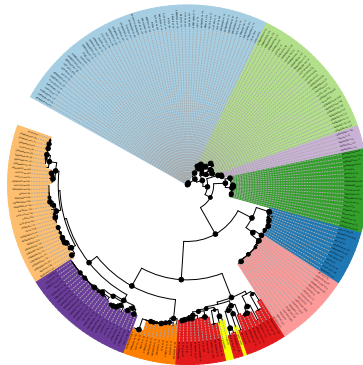

## Portal

Tree scale: 0.1

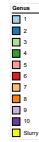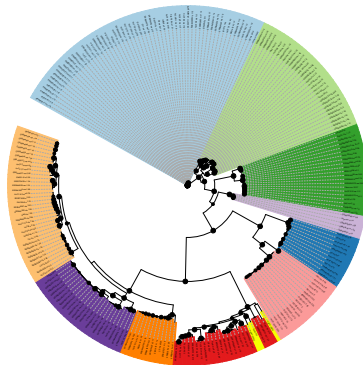

## Major Capsid Protein

Tree scale: 0.1

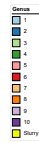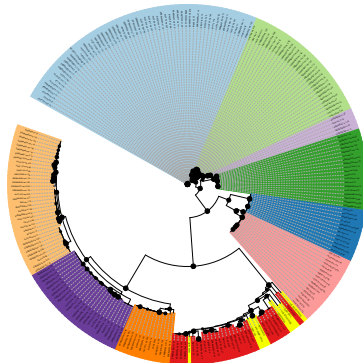

Supplementary figure 4

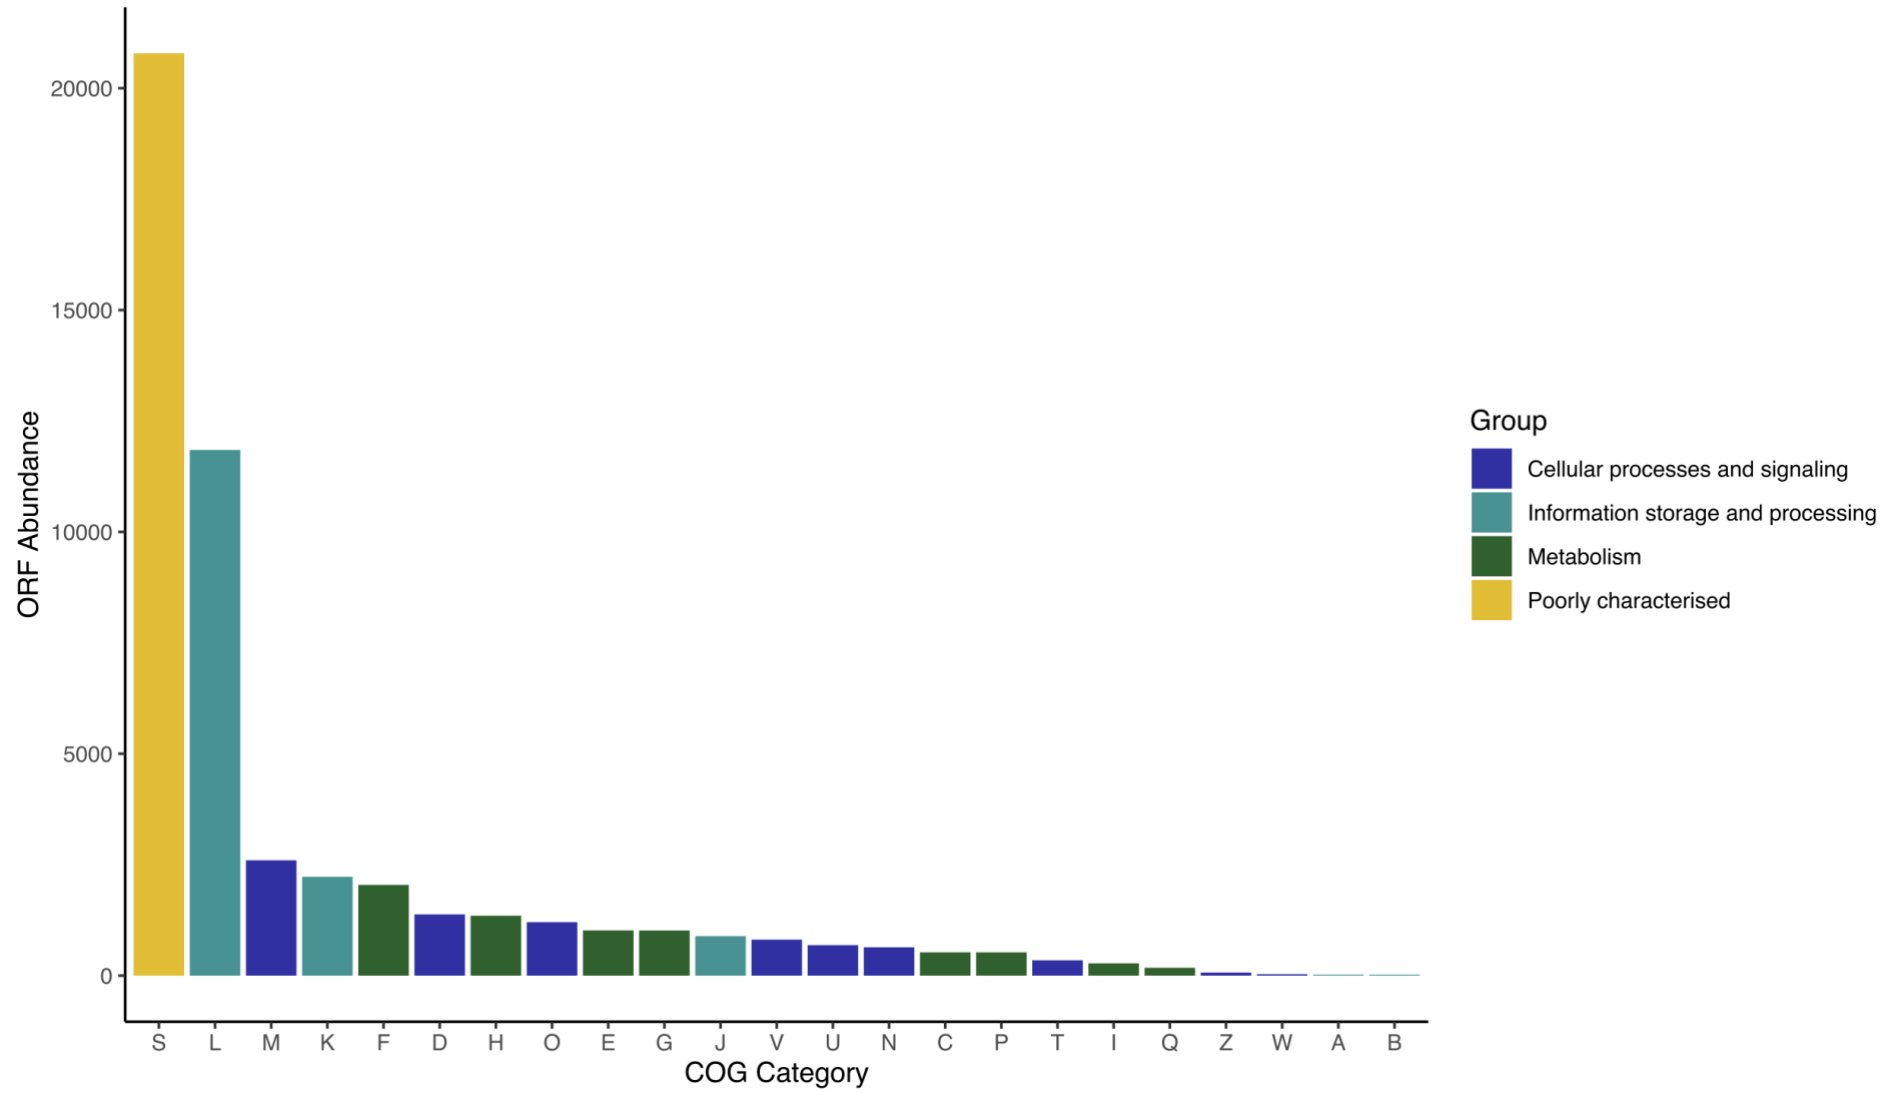

Supplementary figure 5

Tree scale: 1

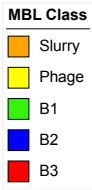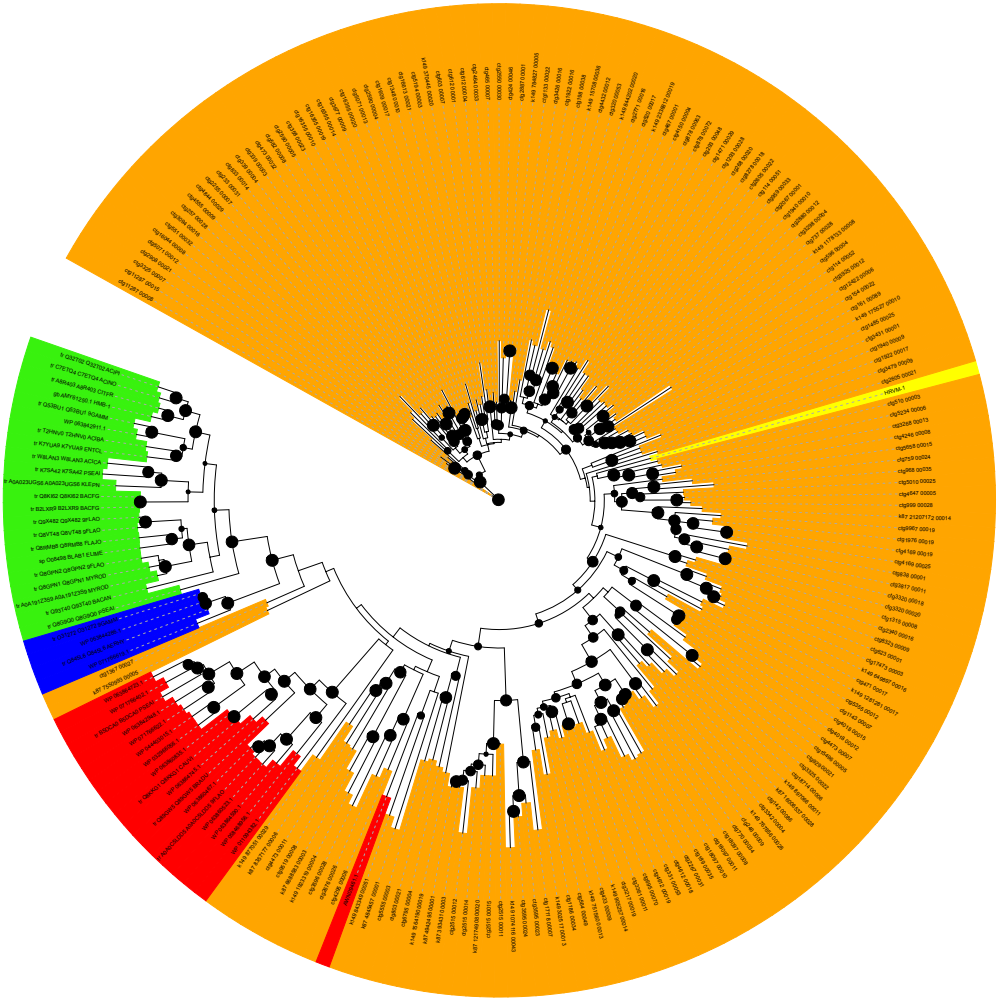

Supplementary figure 6

Tree scale: 1

**Viral Families**

- ★ Ackermannviridae
- ★ Autographviridae
- ★ Chaseviridae
- ★ Corticoviridae
- ★ Cystoviridae
- ★ Demereciviridae
- ★ Drexelviridae
- ★ Herelleviridae
- ★ Inoviridae
- ★ Leviridae
- ★ Lightbulbvirus
- ★ Microviridae
- ★ Myoviridae
- ★ Plasmaviridae
- ★ Podoviridae
- ★ Siphoviridae
- ★ Sphaerolipoviridae

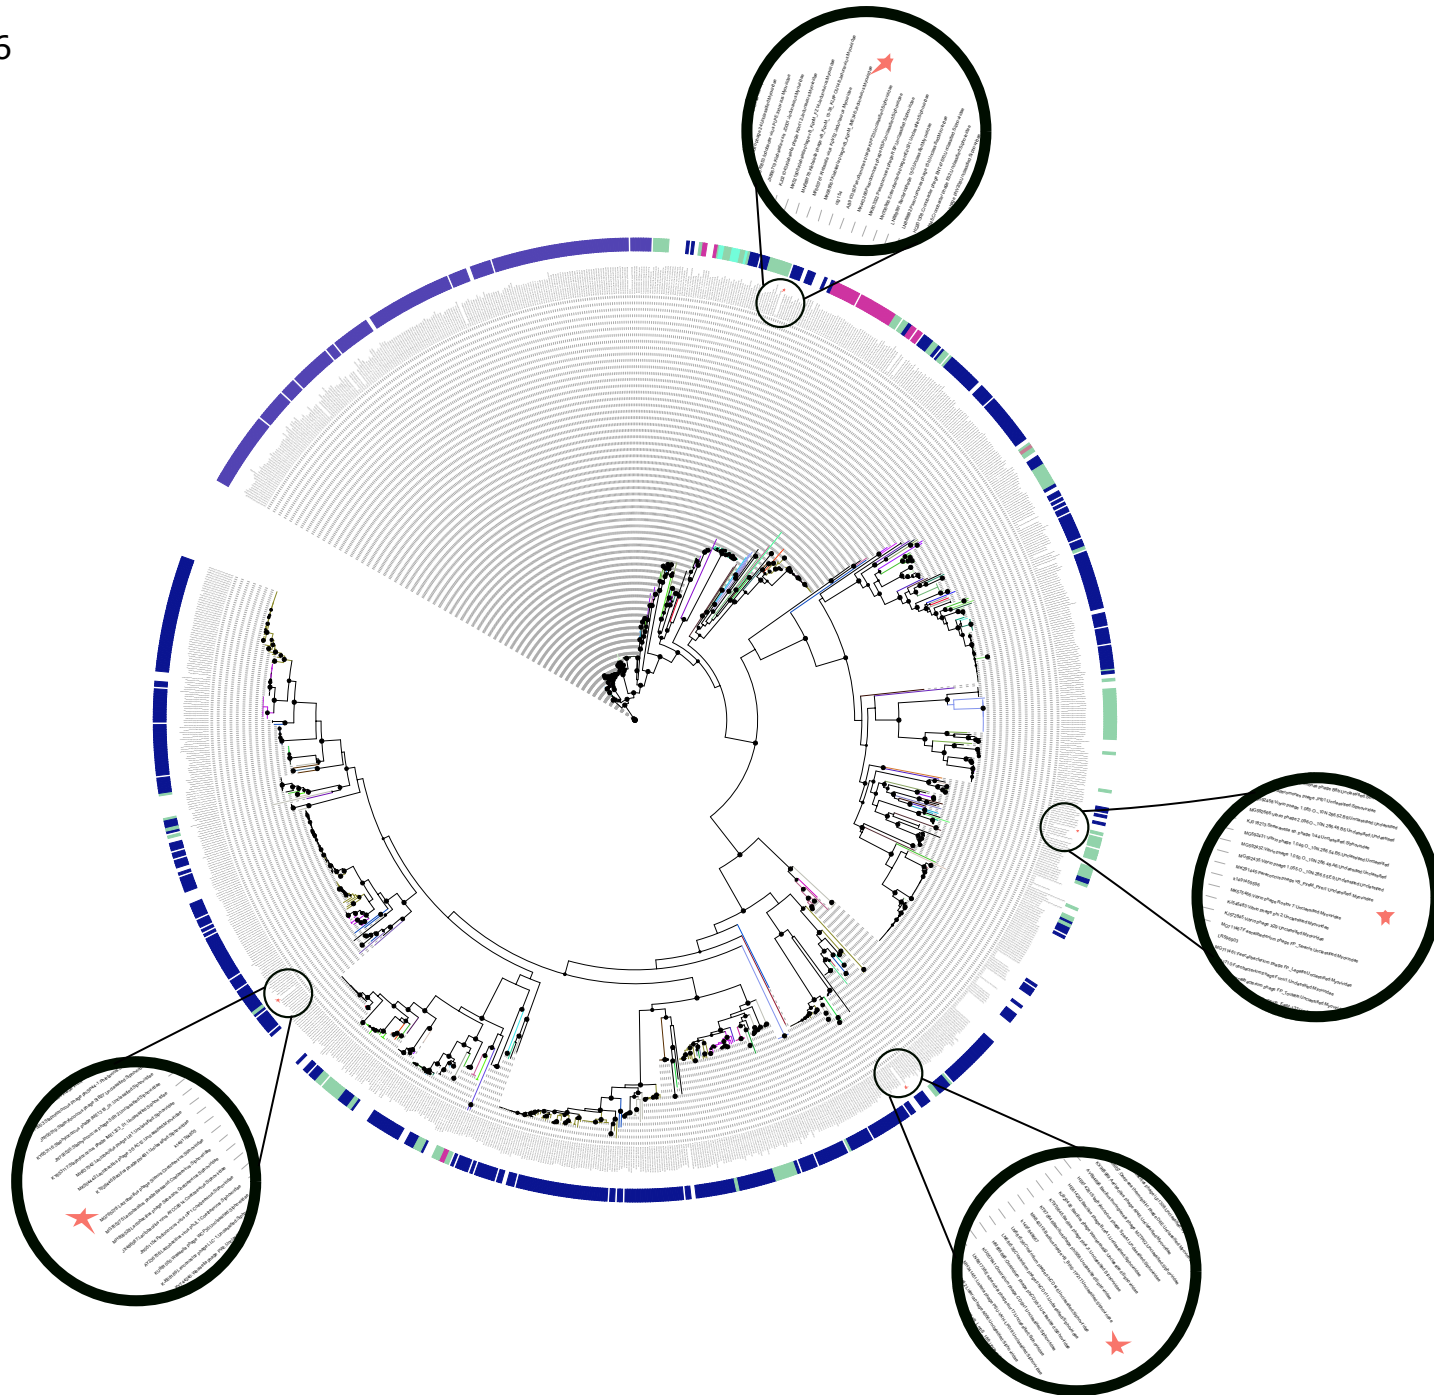

Supplement: 40168_2021_1010_MOESM3_ESM.pdf [file 40168_2021_1010_MOESM3_ESM.pdf]
